# Supplementary material
Source: publisher figshare collection journal article supplement (https://f1000.figshare.com/articles/dataset/_/821273)
Supplement: Supplementary file 2 [file 1]

## **De-funnelling task**

### **Study purpose questions**

1. What do you think we were trying to test?
2. What do you think was changed throughout the experiments?
3. Do you think anything affected your performance in the tasks?

### **If colour is mentioned;**

1. Do you have any idea of what the purpose of changing colour could be?
2. Do you think you performed differently under different colours?

### **'Awareness tests'**

1. How many dots were moving in each square? (decoy question)
2. Can you name the colour of the fixation cross in the experiments?
3. Were the squares split left to right in every experiment? (decoy question)
4. Can you name the colour of the instructions?
